# Supplementary material
Source: publisher figshare collection journal article supplement (https://acs.figshare.com/ndownloader/files/4286080)
Supplement: Supplementary file 1 [file 4286080]

## **Supporting Information**

# **Hybrid Sulfonic Acid Catalysts based on Silica -Supported Poly(styrene sulfonic acid) Brush Materials and their Application in Ester Hydrolysis**

Wei Long<sup>1</sup> and Christopher W. Jones<sup>1,2\*</sup>

*School of Chemistry & Biochemistry<sup>1</sup> School of Chemical & Biomolecular Engineering<sup>2</sup>,  
Georgia Institute of Technology, 311 Ferst Dr., Atlanta, GA 30332  
cjones@chbe.gatech.edu*

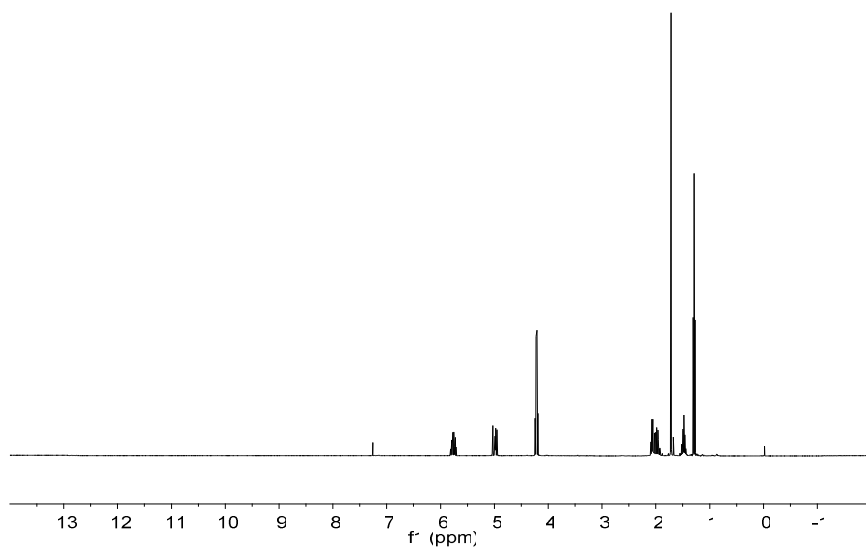

**Figure S1.**  $^1\text{H}$  NMR of ethyl 2-chloro-2-methyl-6-heptenoate

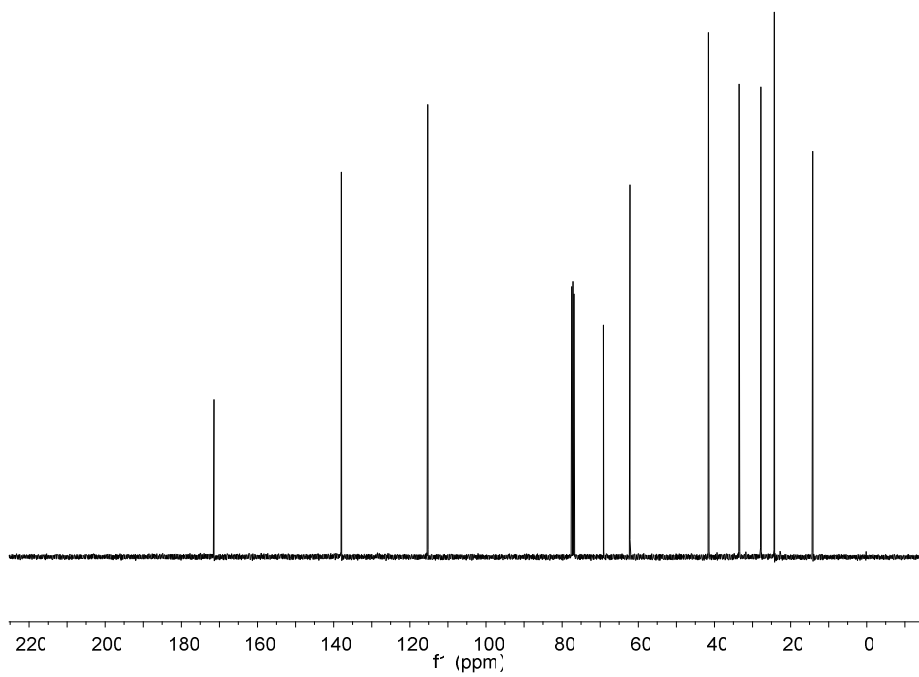

**Figure S2.**  $^{13}\text{C}$  NMR of ethyl 2-chloro-2-methyl-6-heptenoate

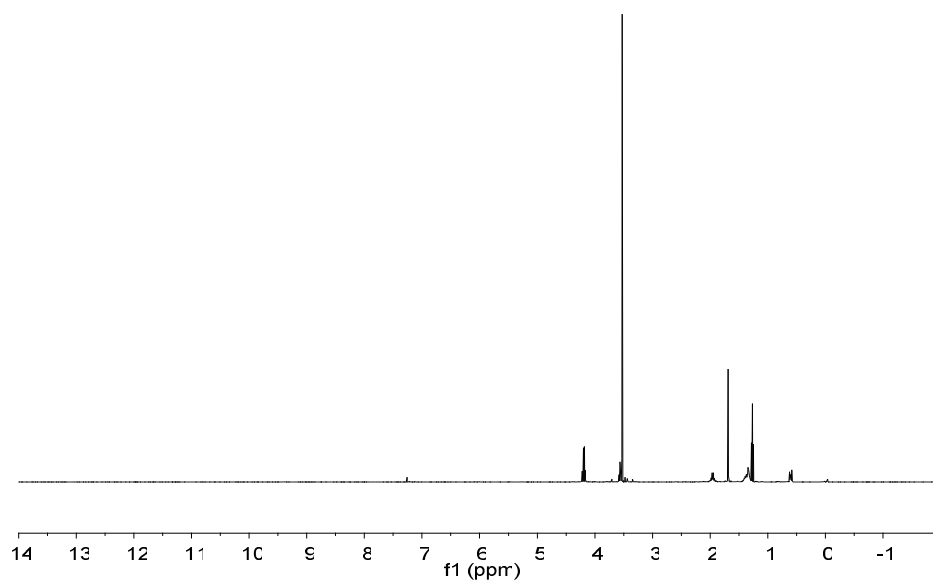

**Figure S3.**  $^1\text{H}$  of ethyl 2-chloro-2-methyl-7-(trimethoxysilyl) heptanoate

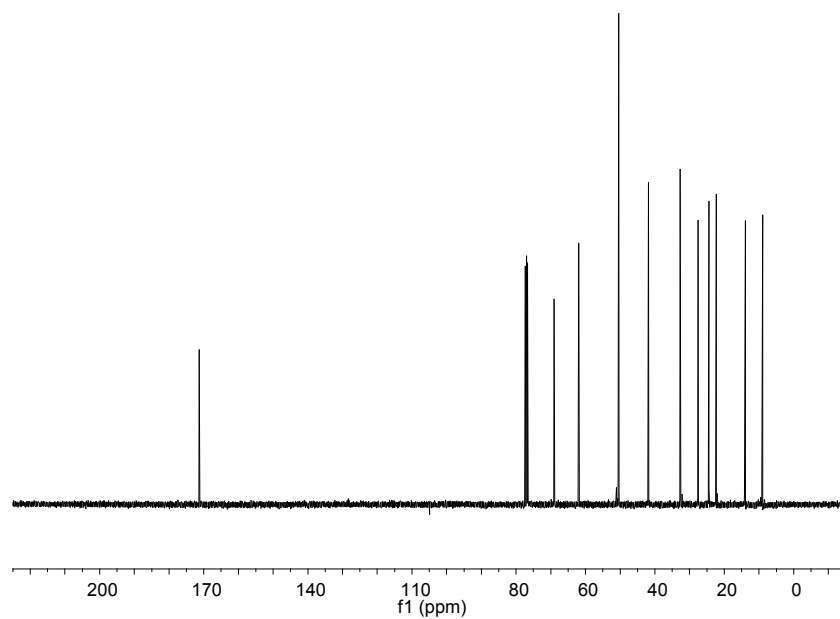

**Figure S4.**  $^{13}\text{C}$  of ethyl 2-chloro-2-methyl-7-(trimethoxysilyl) heptanoate

**Calculation of number of initiators on the silica surface:**

$$\text{Initiator density} = \text{initiator loading} \times N_A / \text{SA}$$

$$\text{Initiator loading} = \text{mmol of initiator} / \text{g of sample}$$

$$\text{Initiator density} = \text{no. of initiator} / \text{nm}^2 \text{ of surface}$$

$$\text{Surface area (SA) of Cab-O-Sil M5} = 200 \text{ m}^2/\text{g}$$

**Table S1.** Polymer loadings of SiO<sub>2</sub>@PSt.

| Materials                  | Polymer loading<br>(from TGA) | Polymer loading (calculated<br>from mass balance) |
|----------------------------|-------------------------------|---------------------------------------------------|
| SiO <sub>2</sub> @alkyl-PS | 0.55                          | 0.64                                              |
| SiO <sub>2</sub> @ester-PS | 0.41                          | 0.44                                              |

Calculation of polymer loading (from TGA):

$$W_i = \text{w.t. \% of initiator} / \text{w.t. \% of silica (in the SiO}_2\text{@initiator)}$$

$$W_o = \text{w.t. \% of organic groups} / \text{w.t. \% of silica (in the SiO}_2\text{@PS)}$$

$$W_p = \text{w.t. \% of polymer} / \text{w.t. \% of silica} = W_o - W_i$$

$$\text{Polymer loading (w.t. \%)} = W_p / (1 + W_p + W_i)$$

Calculation of polymer loading (from mass balance):

$$\text{Polymer loading (w.t. \%)} =$$

$$= (\text{the mass of styrene} \times \text{conv.}) / (\text{the mass of silica supported initiator} + \text{the mass of styrene} \times \text{conv.})$$

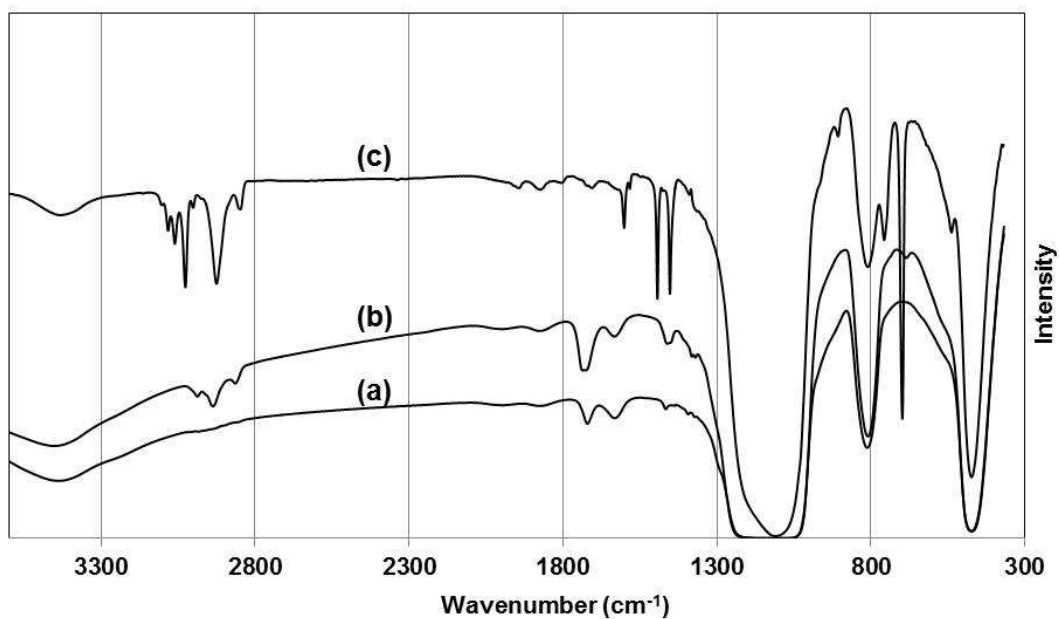

**Figure S5.** FT-IR of SiO<sub>2</sub>@ester initiator (a); SiO<sub>2</sub>@alkyl initiator (b); SiO<sub>2</sub>@ester-PSt (c).

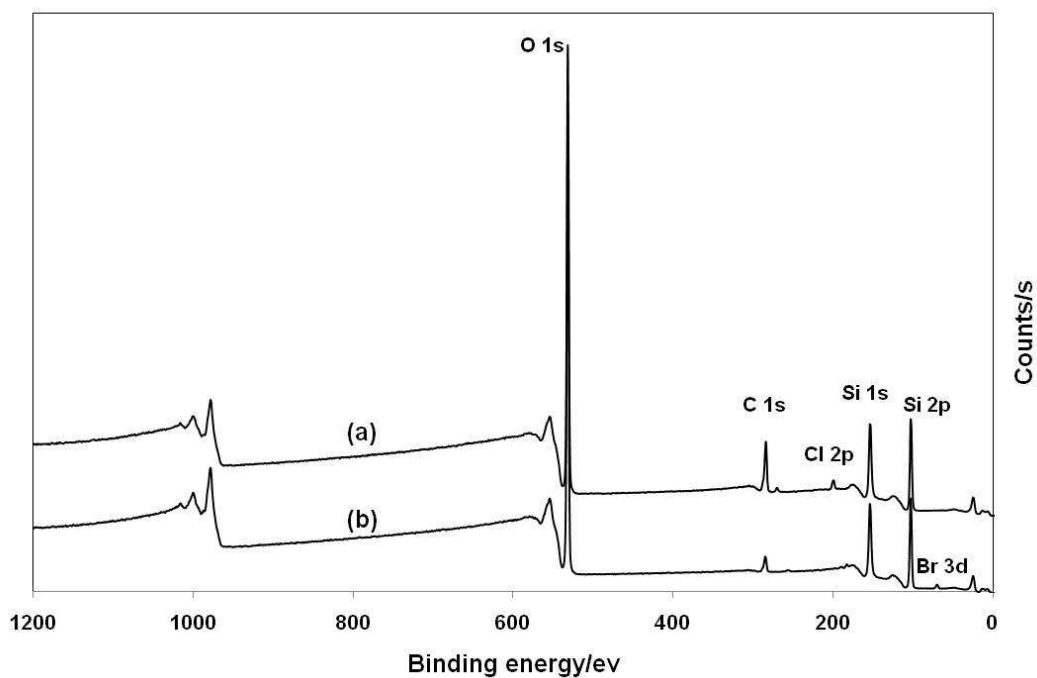

**Figure S6.** XPS spectra of SiO<sub>2</sub>@alkyl initiator (a); SiO<sub>2</sub>@ester initiator (b).

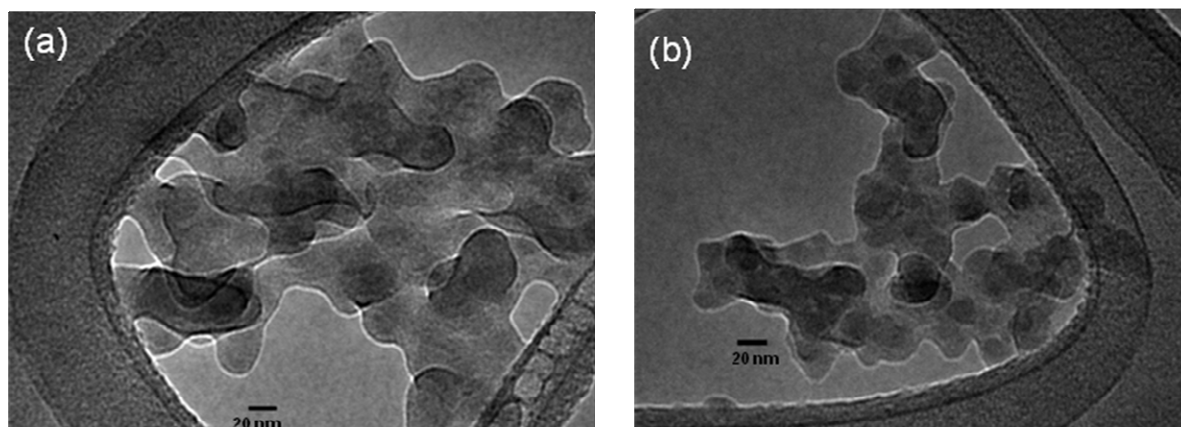

**Figure S7.** TEM images of SiO<sub>2</sub>@alkyl-PS (a); SiO<sub>2</sub>@ester-PS (b), at identical magnification.

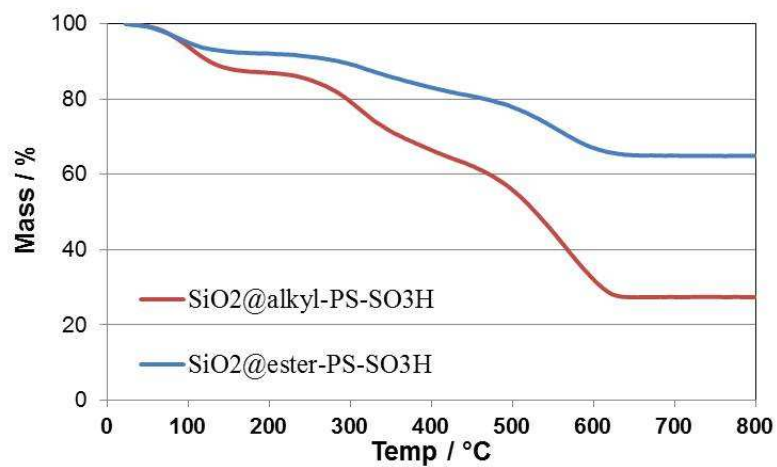

**Figure S8.** TGA of SiO<sub>2</sub>@alkyl-PS-SO<sub>3</sub>H.

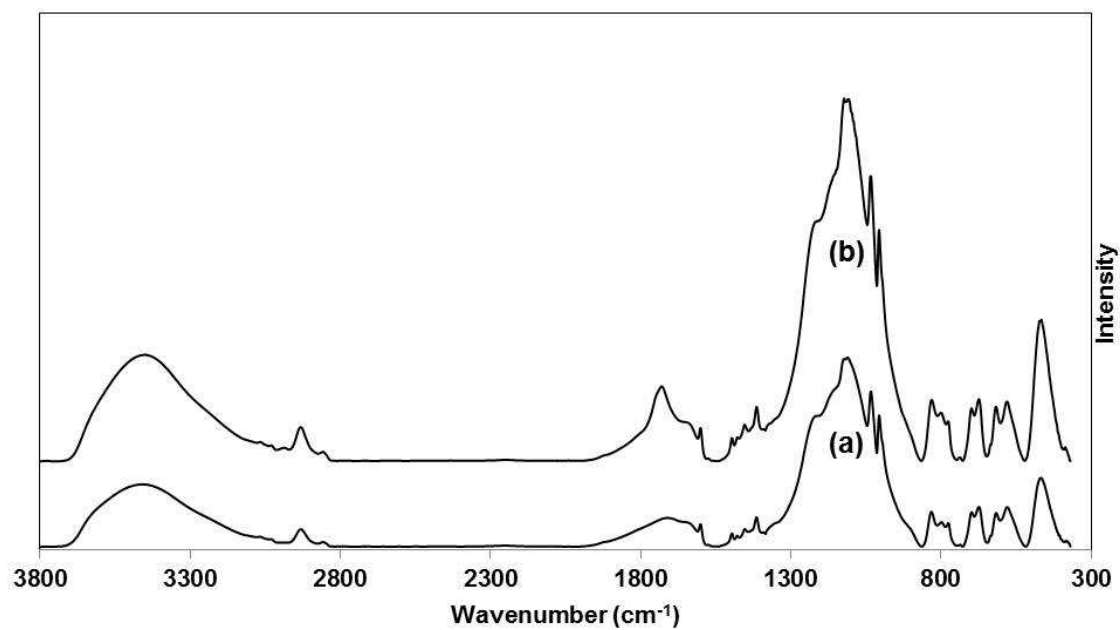

**Figure S9.**FT-IR spectra of SiO<sub>2</sub>@alkyl-PS-SO<sub>3</sub>H (a); SiO<sub>2</sub>@alkyl-PS-SO<sub>3</sub>H after run 1 (b).

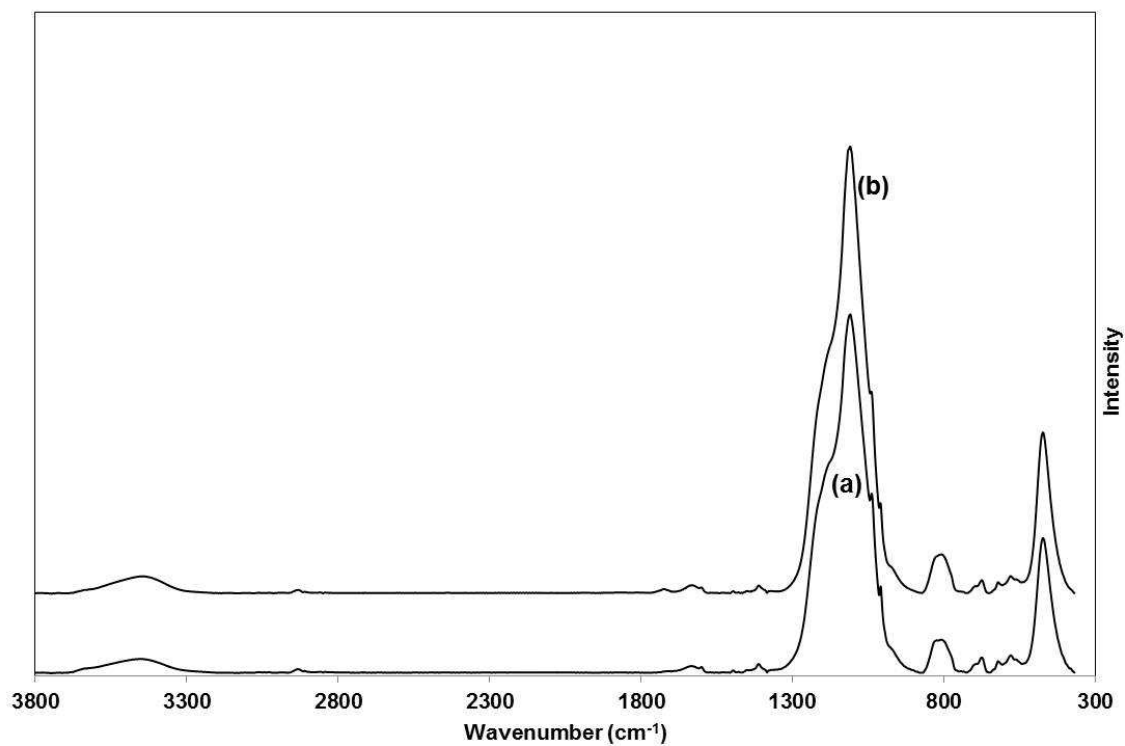

**Figure S10.**FT-IR spectra of SiO<sub>2</sub>@ester-PS-SO<sub>3</sub>H (a); SiO<sub>2</sub>@ester-PS-SO<sub>3</sub>H after run 1 (b).

**Table S2.** EA of the fresh SiO<sub>2</sub>@alkyl-PS-SO<sub>3</sub>H and the recycled ones.

| Catalysts                 | C wt% | S wt% | Si wt% | S/C   | C mmol/g<br>SiO <sub>2</sub> |
|---------------------------|-------|-------|--------|-------|------------------------------|
| Fresh                     | 33.15 | 10.45 | 13.5   | 0.118 | 95.6                         |
| After 1 <sup>st</sup> run | 30.71 | 7.4   | 15.12  | 0.090 | 79.0                         |
| After 3 <sup>rd</sup> run | 32.83 | 7.5   | 20.01  | 0.086 | 63.9                         |

**Table S3.** EA of the fresh SiO<sub>2</sub>@ester-PS-SO<sub>3</sub>H and the recycled ones.

| Catalysts                 | C wt% | S wt% | Si wt% | S/C   | C mmol/g<br>SiO <sub>2</sub> |
|---------------------------|-------|-------|--------|-------|------------------------------|
| Fresh                     | 15.64 | 4.85  | 32.19  | 0.116 | 18.9                         |
| After 1 <sup>st</sup> run | 12.60 | 3.72  | 45.74  | 0.110 | 10.7                         |
| After 3 <sup>rd</sup> run | 8.45  | 1.395 | 48.72  | 0.062 | 6.75                         |

**Table S4.** Surface initiated ATRP on SiO<sub>2</sub>@ester initiator \_2.

| Materials                        | Loading of<br>SiO <sub>2</sub> @ester<br>initiator_2<br>(mmol/g) | [M]/[SiO <sub>2</sub><br>@initiator] | Conv. | [M] <sub>polymerized</sub> /<br>[SiO <sub>2</sub> @initiator] | Organic<br>loading | Organic loading<br>after re-washing |
|----------------------------------|------------------------------------------------------------------|--------------------------------------|-------|---------------------------------------------------------------|--------------------|-------------------------------------|
| SiO <sub>2</sub> @ester<br>-PS-2 | 0.44                                                             | 50                                   | 71%   | 35.5                                                          | 61.5%              | 61.3%                               |



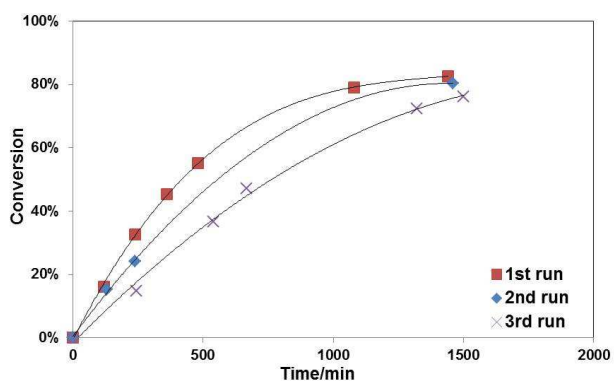

**Figure S11.** Kinetics of SiO<sub>2</sub>@ester-PS-SO<sub>3</sub>H<sub>2</sub> during recycles. (1.25 mol% catalyst loading, 60 °C)

**Table S5.** EA of the fresh SiO<sub>2</sub>@ester-PS-SO<sub>3</sub>H<sub>2</sub> and the recycled catalysts.

| Catalysts                 | C wt% | S wt% | Si wt% | S/C   | C mmol/g<br>SiO <sub>2</sub> |
|---------------------------|-------|-------|--------|-------|------------------------------|
| Fresh                     | 26.43 | 7.09  | 15.12  | 0.100 | 68.0                         |
| After 1 <sup>st</sup> run | 28.05 | 6.70  | 20.03  | 0.089 | 54.5                         |
| After 2 <sup>nd</sup> run | 23.87 | -     | 21.83  | -     | 42.6                         |
